# Supplementary material for: Genome-wide analysis reveals the ancient and recent admixture history of East African Shorthorn Zebu from Western Kenya
Source: PubMed Central journal article supplement (PMC4181064; doi:10.1038/hdy.2014.31), 2014-04-16

● IDEAL lab - Busia

■ Study sub-locations

□ Sub-locations within 45km buffer

### Agro-ecological zones

■ LM1

■ LM2

■ LM3

■ UM3

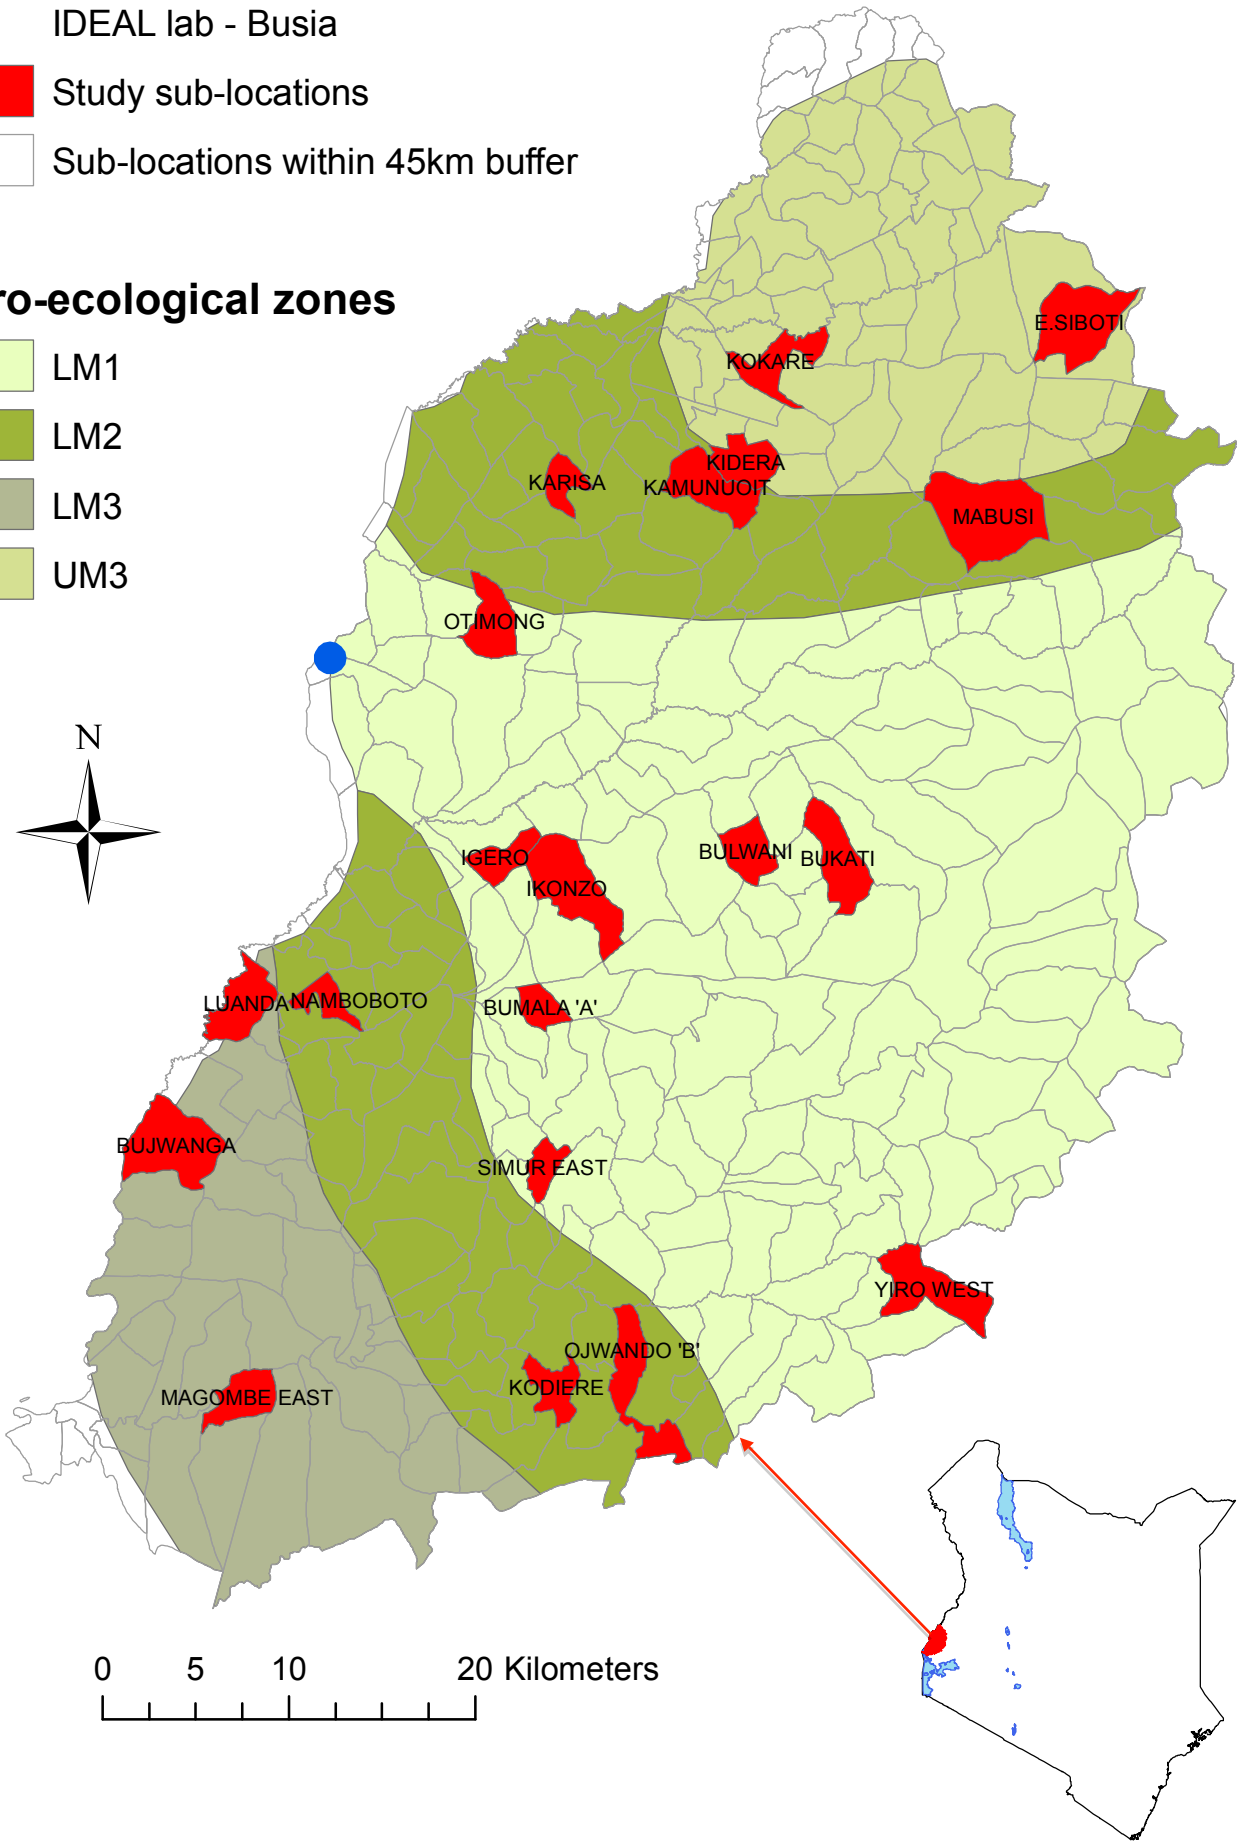

Supplement: hdy201431x1.pdf [file hdy201431x1.pdf]
