# Supplementary material for: Genome-wide analysis reveals the ancient and recent admixture history of East African Shorthorn Zebu from Western Kenya
Source: PubMed Central journal article supplement (PMC4181064; doi:10.1038/hdy.2014.31), 2014-04-16

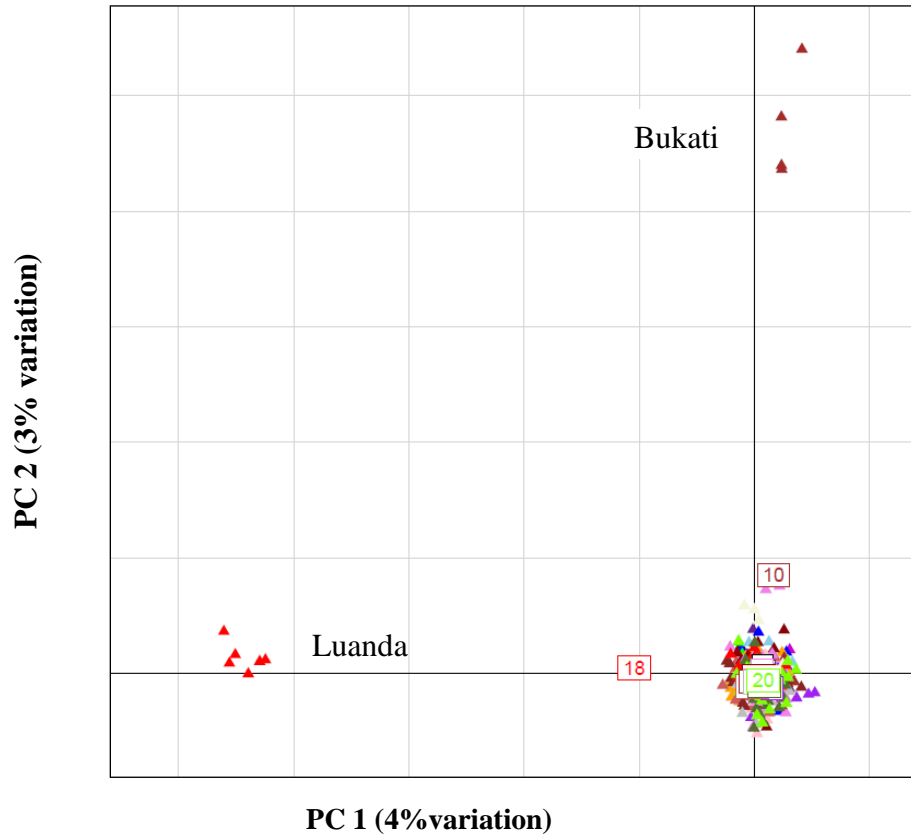

Supplement: hdy201431x7.pdf [file hdy201431x7.pdf]
